# Supplementary material for: Characterization of Human Norovirus Nonstructural Protein NS1.2 Involved in the Induction of the Filamentous Endoplasmic Reticulum, Enlarged Lipid Droplets, LC3 Recruitment, and Interaction with NTPase and NS4
Source: MDPI journal article supplement (doi:10.3390/v15030812), 2023-03-22
Supplement: s1 [file s1]

**Table S1.** Primers used in the study.

| Name of clone                                        | Primer name and sequence (5'-3')                                                                                     | Primer use                        |
|------------------------------------------------------|----------------------------------------------------------------------------------------------------------------------|-----------------------------------|
| F-NS1.2 (1-131)                                      | NS1.2 $\Delta$ 321-330-F: TGATCTAGAGACCAAGGGCG<br>NS1.2 $\Delta$ 132-330-R: TTCCAGAATTGTTCCAGTCAGTGG                 | Q5, Template: F-NS1.2             |
| F-NS1.2 (117-250)                                    | NS1.2 $\Delta$ 1-117-F: GAGAATAGGGATGCTAAGGA<br>NS1.2 $\Delta$ 1-131-R: TGAATTCGCGGCCGCAAGCT                         | Q5, Template: F-NS1.2 (1-250)     |
| F-NS1.2 (251-330)                                    | 251-F: TTAAAGAAGGTAGCTAACATATTCC<br>NS1.2 $\Delta$ 1-131-R: TGAATTCGCGGCCGCAAGCT                                     | Q5, Template: F-NS1.2             |
| F-NS1.2 (233-330)                                    | 233-F: AGACCCTACCAAGATTGGAATAGG<br>NS1.2 $\Delta$ 1-131-R: TGAATTCGCGGCCGCAAGCT                                      | Q5, Template: F-NS1.2             |
| F-NS1.2 (1-250)                                      | NS1.2 $\Delta$ 321-330-F: TGATCTAGAGACCAAGGGCG<br>250-R: TTTGGAATCATCCGTAGTAGGG                                      | Q5, Template: F-NS1.2             |
| F-NS1.2 (1-280)                                      | NS1.2 $\Delta$ 321-330-F: TGATCTAGAGACCAAGGGCG<br>NS1.2 $\Delta$ 280-330-R: GAGAGGCCTTAACCTTCCTA                     | Q5, Template: F-NS1.2             |
| F-NS1.2 (1-280L <sub>262</sub> F <sub>266</sub> /ED) | NS1.2(1-280) LF/ED-F: CGCTAGACACCAGGCCCATAAAAGAC<br>NS1.2(1-280) LF/ED-R: AAGACTCGGTACACAGGAATATGTTAGC               | Q5, Template: F-NS1.2 (1-280)     |
| F-NS1.2 (117-330)                                    | NS1.2 $\Delta$ 1-117-F: GAGAATAGGGATGCTAAGGA<br>NS1.2 $\Delta$ 1-131-R: TGAATTCGCGGCCGCAAGCT                         | Q5, Template: F-NS1.2             |
| F-NS1.2 ( $\Delta$ 117-250)                          | 251-F: TTAAAGAAGGTAGCTAACATATTCC<br>NS1.2 $\Delta$ 117-330-R: CCTCTGATTGAGTGGAGGGA                                   | Q5, Template: F-NS1.2             |
| GFP-NS1.2                                            | NS1.2 1-330-F: CTT <u>CGAATTC</u> AATGAAGATGGCGTCTAACG<br>NS1.2 1-330-R: CGGT <u>GGATCCT</u> CATTGTAACTCGAAATACC GAG | PCR amplification                 |
| GFP-NS1.2 (250-330)                                  | NS1.2 251-F: CTT <u>CGAATTC</u> ATTAAAGAAGGTAGCTAACATA<br>NS1.2 1-330-R: CGGT <u>GGATCCT</u> CATTGTAACTCGAAATACCGAG  | PCR amplification                 |
| GFP-NS1.2-(280-330)                                  | NS1.2 281-F: CTT <u>CGAATTC</u> CAACATCATCAACATCCTAGCT<br>NS1.2 1-330-R: CGGT <u>GGATCCT</u> CATTGTAACTCGAAATACC GAG | PCR amplification                 |
| GFP-NS1.2 (250-290)                                  | eGFP-stop-F: TGAG <u>GGATT</u> CACCGATCTAG<br>290-R: ATCACATGAAGCTAGGATGT                                            | Q5, Template: GFP-NS1.2 (250-330) |
| NS1.2 (1-250)-Myc                                    | pCMV3Tag-4-F: GAATTCGATATCAAGCTTATCGATACCG<br>250-R: TTTGGAATCATCCGTAGTAGGG                                          | Q5, Template: NS1.2-Myc           |
| NS1.2 (117-250)-Myc                                  | NS1.2 $\Delta$ 1-117-F: GAGAATAGGGATGCTAAGGA<br>pCMV-3Tag-4-R: CATGGTGGATCCGCCCGGGC                                  | Q5, Template: NS1.2(1-250)-Myc    |
| NS1.2 (233-330)-Myc                                  | 233-F: AGACCCTACCAAGATTGGAATAGG<br>pCMV-3Tag-4-R: CATGGTGGATCCGCCCGGGC                                               | Q5, Template: NS1.2-Myc           |

<sup>a</sup> Restriction enzyme cleavage site are underlined.
